# Supplementary material
Source: PubMed Central journal article supplement (PMC3479375)

# S.Figure 1

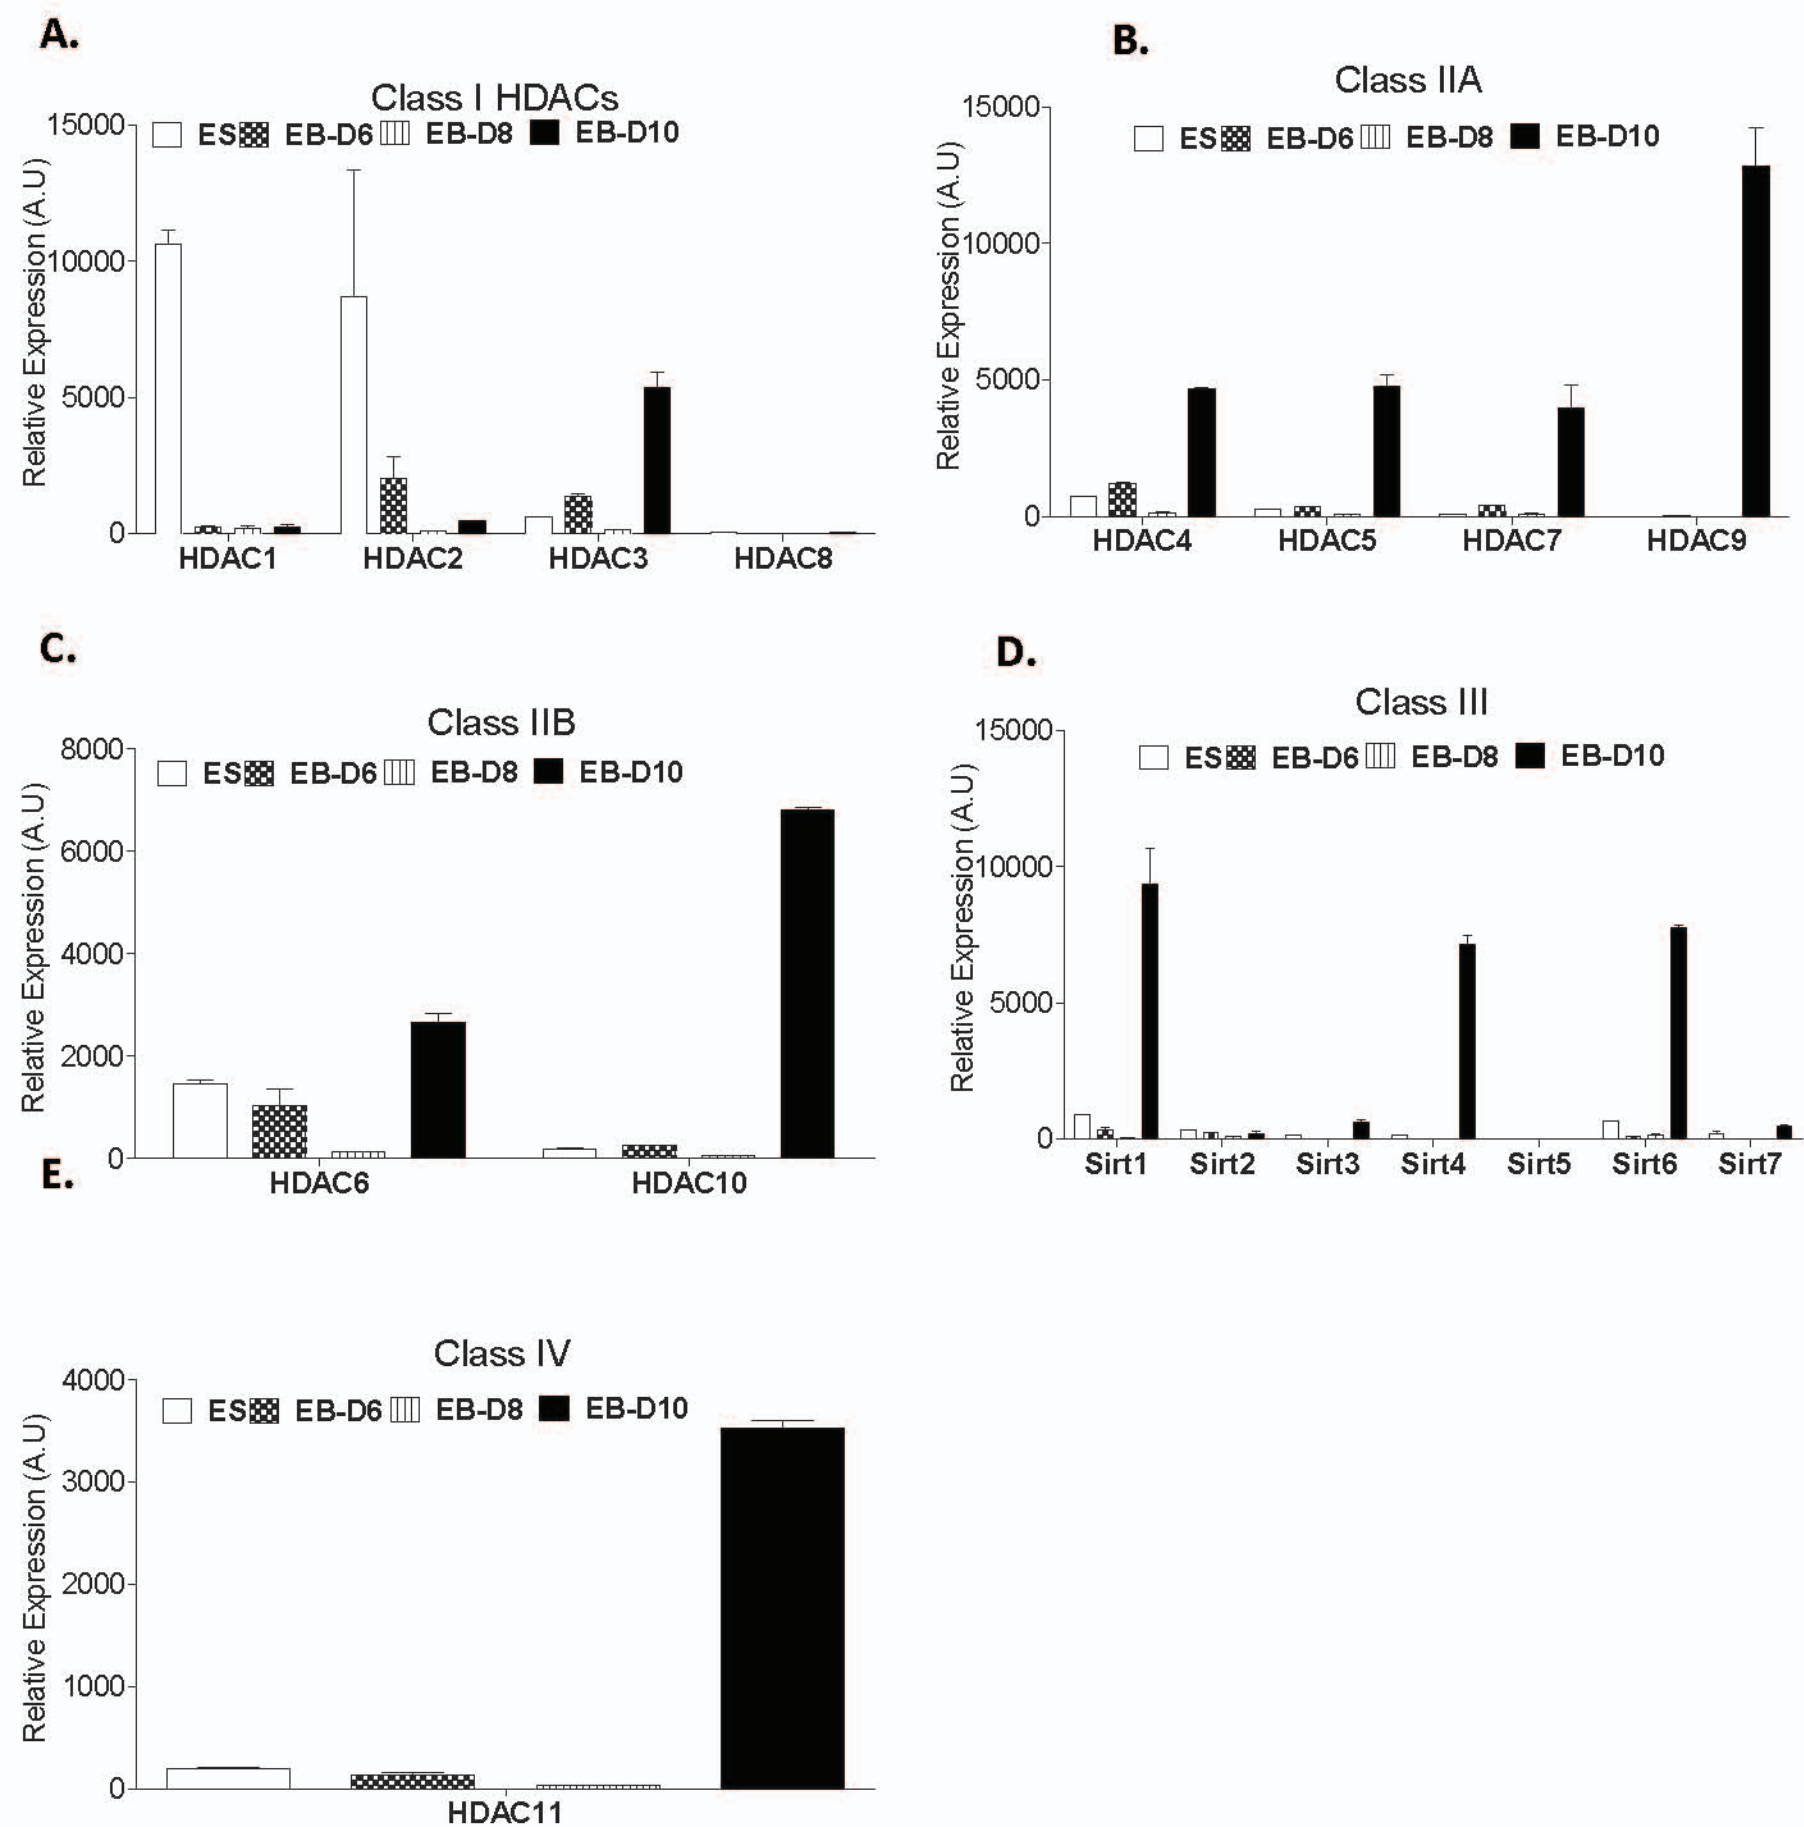

S.Figure 2

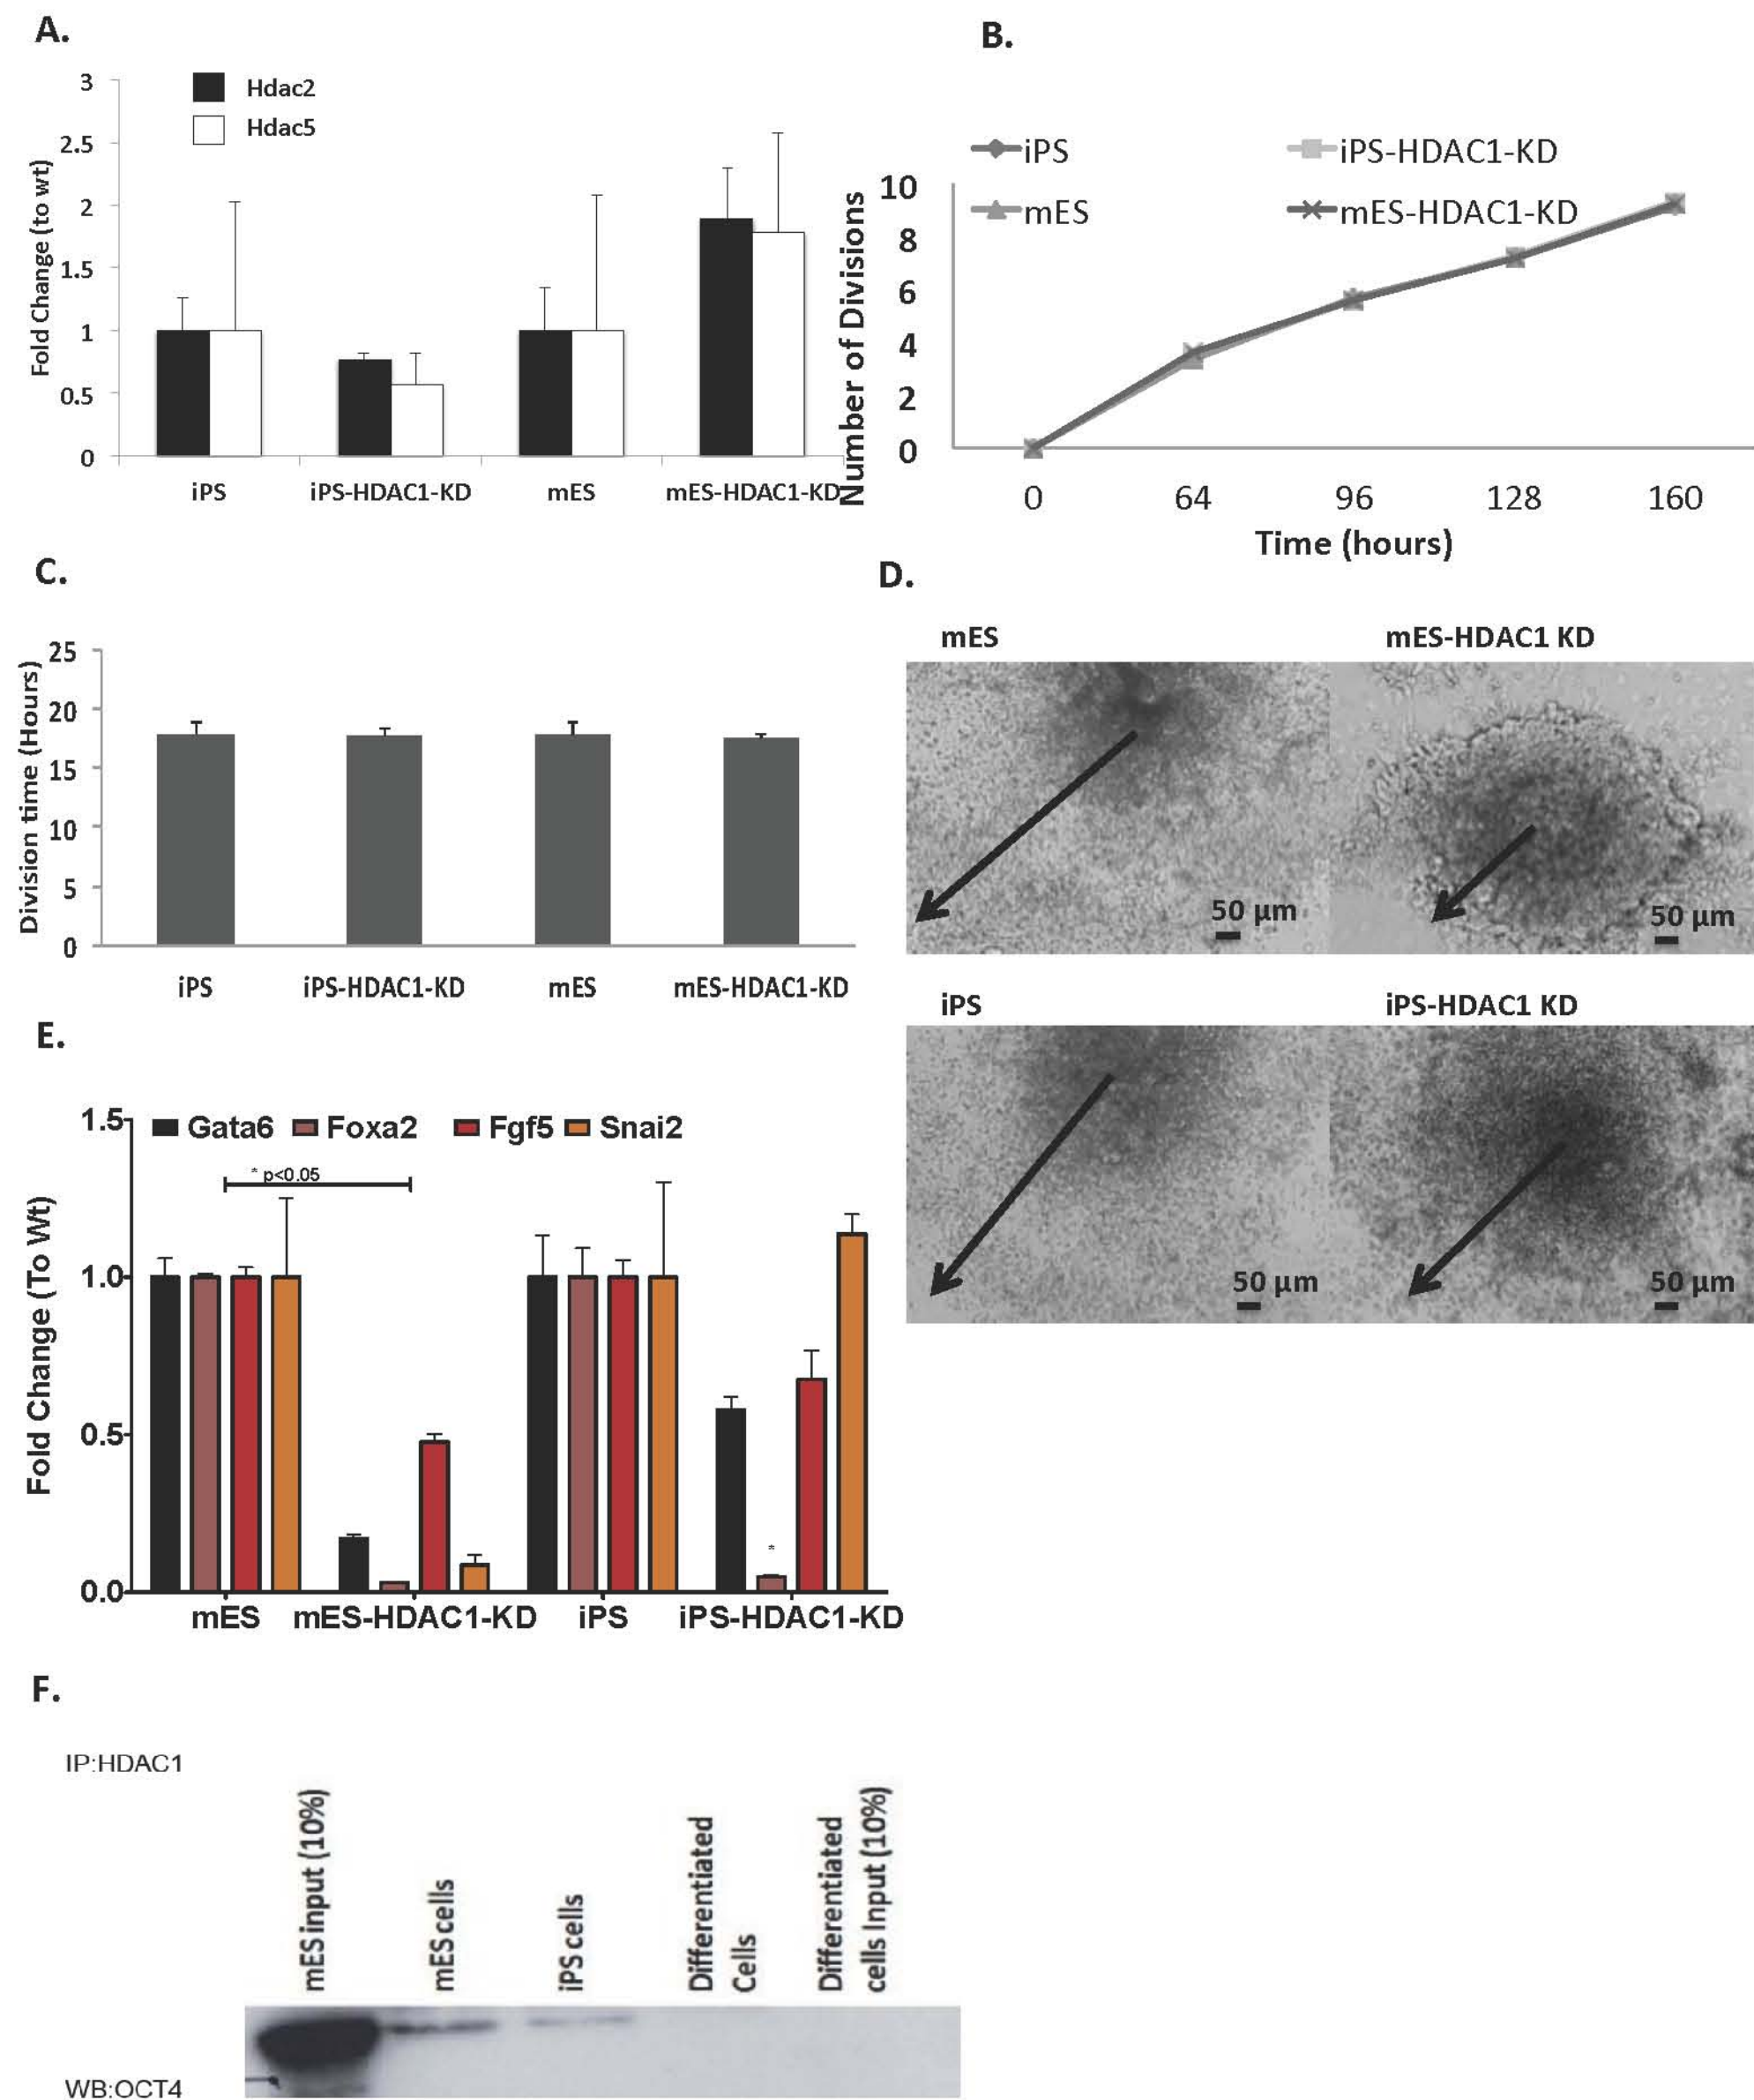

Supplement: NIHMS402265-supplement-Supp_Fig_S1-S2.pdf [file NIHMS402265-supplement-Supp_Fig_S1-S2.pdf]
